# Supplementary material for: Tuneable Fmoc–Phe–(4-X)–Phe–NH2 nanostructures by variable electronic substitution
Source: Royal Society of Chemistry journal article supplement (doi:10.1039/c4cc04926h), 2014-01-01
Supplement: c4cc04926h1.pdf [file c4cc04926h1.pdf]

## Supplementary Information

### **Tuneable Fmoc-Phe(4-X)-Phe-NH<sub>2</sub> nanostructures by variable electronic substitution**

Charalampos G. Pappas<sup>1†</sup>, Yousef M. Abul-Haija<sup>1†</sup>, Angela Flack<sup>1</sup>, Pim W. J. M. Frederix<sup>1,2</sup>, Rein V. Ulijn<sup>1,3,4\*</sup>

† Authors with equal contribution.

<sup>1</sup> WestCHEM, Department of Pure and Applied Chemistry, Thomas Graham Building, 295 Cathedral Street, Glasgow G1 1XL, UK

<sup>2</sup> SUPA, Department of Physics, University of Strathclyde, 107 Rottenrow East, Glasgow, G4 0NG, UK

<sup>3</sup> Advanced Science Research Center (ASRC), City University New York, NY10031, USA

<sup>4</sup> Dept. of Chemistry & Biochemistry, City University of New York, Hunter College, 695 Park Ave., New York, NY 10065, USA

\*Corresponding Author: Prof. Rein V. Ulijn

Email: [rein.ulijn@strath.ac.uk](mailto:rein.ulijn@strath.ac.uk)

## Materials and Methods

All Fmoc-para-substituted derivatives were purchased from Novabiochem, UK except Fmoc-Phenylalanine which was purchased from Sigma Aldrich. Phenylalanine amide was purchased from Bachem and thermolysin from Sigma Aldrich. Purity of all amino acid derivatives was >97%. All reagents were used without further purification.

### Samples Preparation:

For the amide condensation we used 20 mM of the electrophile and 80 mM of the nucleophile in the presence of 1 mg of thermolysin in 1 ml of pH 8 (100 mM) sodium phosphate buffer. All samples were vortexed and sonicated in order to obtain a homogenous mixture.

**Transition electron microscopy (TEM):** Carbon-coated copper grids (200 mesh) were glow discharged in air for 30 s. The support film was touched onto the gel surface for 3 s and blotted down using filter paper. Negative stain (20 ml, 1% aqueous methylamine vanadate obtained from Nanovan; Nanoprobes) was applied and the mixture blotted again using filter paper to remove excess. The dried specimens were then imaged using a LEO 912 energy filtering transmission electron microscope operating at 120kV fitted with 14 bit/2 K Proscan CCD camera.

**Fluorescence spectroscopy:** 1 ml samples were prepared in a 1 cm<sup>2</sup> quartz cuvette. Fluorescence emission spectra were measured on a Jasco FP-6500 spectrofluorometer at a scanning speed of 200 nm.min<sup>-1</sup>. The emission spectra were recorded between 300 and 600 nm resulting from excitation at 280 nm, using a bandwidth of 3 nm with a medium response and a 1 nm data pitch.

**FTIR spectroscopy:** Spectra were acquired using a Bruker Vertex 70 spectrometer with a spectral resolution of 1 cm<sup>-1</sup>. The spectra were obtained by averaging 25 scans per sample. Measurements were performed in a standard IR cuvette (Harrick Scientific), in which the sample was contained between two CaF<sub>2</sub> windows (thickness, 2 mm) separated by a 25 μm PTFE spacer. All sample manipulations were performed in a glove box to minimize interference from atmospheric water vapour. D<sub>2</sub>O (Sigma-Aldrich) was used as solvent for all the infrared spectral measurements.

**High-performance liquid chromatography (HPLC):** A Dionex P680 high-performance liquid chromatography pump was used to quantify conversions of the enzymatic reaction. A 20 μl sample was injected onto a Macherey-Nagel C18 column with a length of 250 mm and an internal diameter of 4.6 mm and 5-mm fused silica particles at a flow rate of 1 ml.min<sup>-1</sup>. The eluting solvent system had a linear gradient of 20% (v/v) acetonitrile in water for 4 min, gradually rising to 80% (v/v) acetonitrile in water at 35 min. This concentration was kept constant until 40 min when the gradient was decreased to 20% (v/v) acetonitrile in water at 42 min. Sample preparation involved mixing 50 ml of gel with acetonitrile–water (1000 ml, 70:30

mixture) containing 0.1% trifluoroacetic acid. The purity of each identified peak was determined by UV detection at 280 nm.

**Circular Dichroism (CD):** Spectra were measured on a JascoJ600 spectropolarimeter with 1 s integrations with a step size of 1 nm and a single acquisition with a slit width of 1 nm. A circular CD cell (Hellma) was used with a path length of 0.1 mm. All the measured CD spectra had values of HT lower than saturation at all wavelengths in all the samples.

## Supporting Data

**Table S1.** Chosen substituents and their corresponding Hammett- $\sigma_p$  values.<sup>1</sup>

| Entry | Substitution (X)                  | Hammett- $\sigma_p$ value |
|-------|-----------------------------------|---------------------------|
| 1     | OH                                | -0.37                     |
| 2     | OPO <sub>3</sub> H <sub>2</sub> * | 0.00                      |
| 3     | H                                 | 0.00                      |
| 4     | F                                 | 0.06                      |
| 5     | CN                                | 0.66                      |
| 6     | NO <sub>2</sub>                   | 0.78                      |

\*Bulky group with stereoelectronic properties.

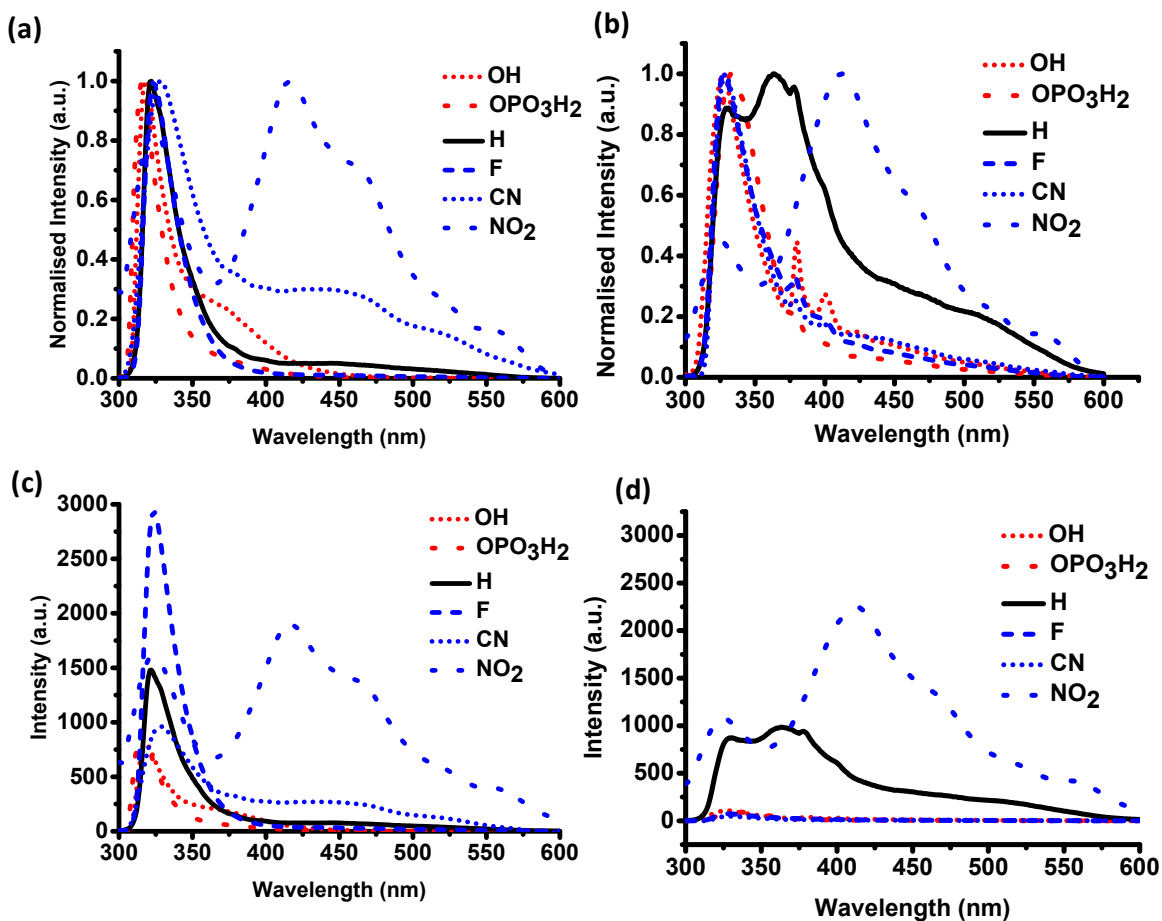

**Figure S1.** Fluorescence spectra of Fmoc-diphenylalanine derivatives before and after thermolysin addition. Normalised spectra before (a), after (b) non-normalised spectra before (c) and after (d).

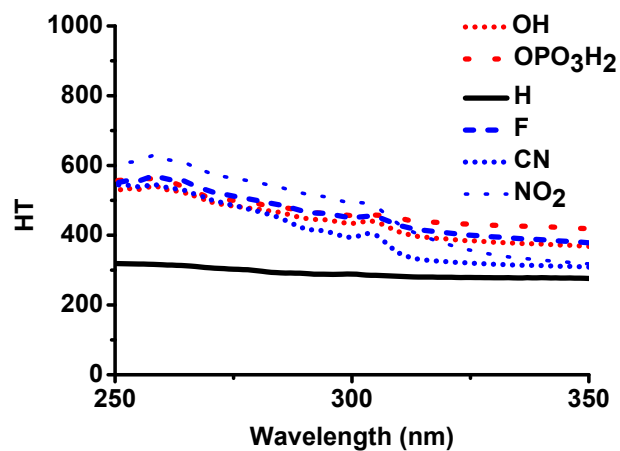

**Figure S2.** High Tension (HT) voltage.

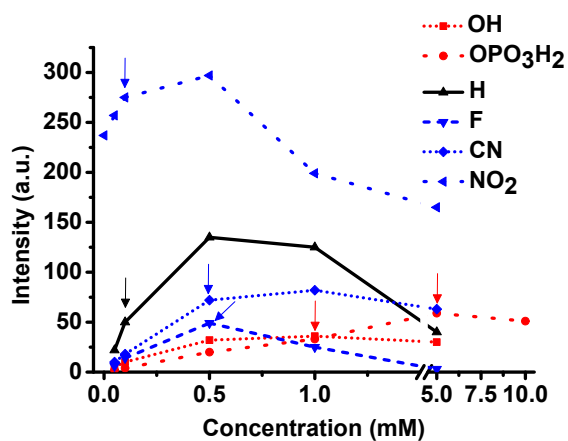

**Figure S3.** CAC values determination by monitoring fluorescence intensity with different concentrations.

## References

1. C. Hansch, A. Leo and R. W. Taft, *Chemical Reviews*, 1991, 91, 165-195.
